# Supplementary material for: Multi-Organs-on-Chips for Testing Small-Molecule Drugs: Challenges and Perspectives
Source: Pharmaceutics. 2021 Oct 11;13(10):1657. doi: 10.3390/pharmaceutics13101657 (PMC8540732; doi:10.3390/pharmaceutics13101657)
Supplement: Supplementary file 1 [file pharmaceutics-13-01657-s001.zip › pharmaceutics-1384243-supplementary.pdf]

# Supplementary Materials: Multi-Organs-On-Chips for Testing Small-Molecule Drugs: Challenges and Perspectives

Berivan Cecen, Christina Karavasili, Mubashir Nazir, Anant Bhusal, Elvan Dogan, Fatemeh Shahriyari, Sedef Tamburaci, Melda Buyukoz, Leyla Didem Kozaci and Amir K. Miri

**Table S1.** Drugs that have been withdrawn from the market owing to their toxicity.

| Drug                   | Toxicity type    | Indication                               | Withdrawn Year | Ref |
|------------------------|------------------|------------------------------------------|----------------|-----|
| Pergolide              | Cardiac toxicity | Parkinson's neurodegeneration            | 2007           | [1] |
| Adderall-XR            | Cardiac toxicity | Attention-deficit hyperactivity disorder | 2005           | [2] |
| Rofecoxib (Vioxx)      | Cardiac toxicity | Acute and chronic pain                   | 2004           | [1] |
| Levacetylmethadol      | Cardiac toxicity | Treatment of opioid addictions           | 2003           | [3] |
| Nefazodone             | Liver toxicity   | Depression                               | 2003           | [3] |
| Droperidol             | Cardiac toxicity | Premedication for anesthesia             | 2001           | [3] |
| Cisapride              | Cardiac toxicity | Gastrointestinal reflux                  | 2000           | [1] |
| Troglitazone (Rezulin) | Liver toxicity   | Anti-inflammatory and anti-diabetic      | 2000           | [1] |
| Terfenadine            | Cardiac toxicity | Allergies                                | 1997-1999      | [1] |

## References

1. Z.P. Qureshi, E. Seoane-Vazquez, R. Rodriguez-Monguio, K.B. Stevenson, S.L. Szeinbach, Market withdrawal of new molecular entities approved in the United States from 1980 to 2009, *Pharmacoepidemiol. Drug Saf.* **2011**, 772–777. <https://doi.org/https://doi.org/10.1002/pds.2155>.
2. L.M. Wang, M. Wong, J.M. Lightwood, C.M. Cheng, Black Box Warning Contraindicated Comedications: Concordance Among Three Major Drug Interaction Screening Programs, *Ann. Pharmacother.* **2010**, 28–34. <https://doi.org/10.1345/aph.1M475>.
3. R. McNaughton, G. Huet, S. Shakir, An investigation into drug products withdrawn from the EU market between 2002 and 2011 for safety reasons and the evidence used to support the decision-making, *BMJ Open.* **2014**, e004221. <https://doi.org/10.1136/bmjopen-2013-004221>.
